# Supplementary material for: Mouth-Level Nicotine Intake Estimates from Discarded Filter Butts to Examine Compensatory Smoking in Low Nicotine Cigarettes
Source: Oxford University Press journal article supplement (doi:10.1158/1055-9965.epi-19-0905), 2020-02-26
Supplement: 10559965epi190905-sup-226512_3_supp_5901222_q0ysm3.docx [file 10559965epi190905-sup-226512_3_supp_5901222_q0ysm3.docx]

Supplementary materials

1. Comparisons of MLI to ISO and IN.

| Nicotine content (mg nicotine /g tobacco) | Comparison to ISO  Mean Difference (95% CI) | p-value | Comparison to IN  Mean Difference (95% CI) | p-value |
| --- | --- | --- | --- | --- |
| 15.8 | 0.308 (0.205,0.412) | <0.001 | -0.472 (-0.575, -0.368) | <0.001 |
| 5.2 | 0.124 (0.085, 0.164) | <0.001 | -0.141 (-0.180, -0.101) | <0.001 |
| 2.4 | 0.055 (0.034, 0.076) | <0.001 | -0.055 (-0.076, -0.034) | <0.001 |
| 1.3 | 0.034 (0.021, 0.046) | <0.001 | -0.021 (-0.034, -0.009) | 0.002 |
| 0.4 | 0.014 (0.009, 0.018) | <0.001 | -0.006 (-0.011, -0.002) | 0.002 |
| 0.4 HT | 0.004 (-0.002, 0.009) | 0.22 | -0.026 (-0.032, -0.021) | <0.001 |

Table Note: ISO=International Standards Organization, IN=Canadian Intensive, HT=high tar

1. Compensation Index and Change in Intensity calculated using IN methodology

| Nicotine content (mg nicotine /g tobacco) | CI (95% confidence interval) | Change in Intensity |
| --- | --- | --- |
| 5.2 | 0.033 (-0.061, 0.147) | 9.9% |
| 2.4 | 0.011 (-0.022, 0.0510 | 7.4% |
| 1.3 | 0.008 (-0.008, 0.027) | 10% |
| 0.4 | 0.006 (0.000, 0.013) | 22.4% |
| 0.4 HT | -0.007 (-0.014, 0.002) | -13.8% |

Table Note: CI=compensation index, HT=high tar

1. Cigarettes per day during Week 6 of clinical trial

| **All participants in clinical trial (data replicated from primary paper [3])** | |
| --- | --- |
| Nicotine content (mg nicotine / g tobacco) | Cigarettes per day |
| 15.8 | 21.3 |
| 5.2 | 20.8 |
| 2.4 | 16.5 |
| 1.3 | 16.3 |
| 0.4 | 14.9 |
| 0.4 HT | 15.8 |
| **Subset of participants included in cigarette butt analysis** | |
| Nicotine content (mg nicotine / g tobacco) | Cigarettes per day |
| 15.8 | 21.8 |
| 5.2 | 22.8 |
| 2.4 | 16.4 |
| 1.3 | 17.2 |
| 0.4 | 15.2 |
| 0.4 HT | 17.1 |

Table Note: HT=high tar
